# Supplementary material for: Impact of Fruit and Vegetable Protein vs. Milk Protein on Metabolic Control of Children with Phenylketonuria: A Randomized Crossover Controlled Trial
Source: MDPI journal article supplement (doi:10.3390/nu14204268), 2022-10-13
Supplement: s1 [file s1]

**Supplementary Table S1.** Natural protein intake and intervention in each week of the study.

| Dietary Intake During Each Week of the Study |                                                                                             |                                           |                                                                                                           |
|----------------------------------------------|---------------------------------------------------------------------------------------------|-------------------------------------------|-----------------------------------------------------------------------------------------------------------|
| Intervention                                 | Number of Subjects Who Stopped Each Arm of The Study Due to High Blood Phenylalanine Levels | Median Daily Exchanges Prescribed (Range) | Sources Used for Extra Phe (Number of Times Food was Used During 3-day Diet Diary)                        |
| Phase A<br>week 1 ( <i>n</i> = 16)           | n/a                                                                                         | 5.75<br>(3–25)                            | n/a                                                                                                       |
| Phase A<br>week 2 ( <i>n</i> = 16)           | n/a                                                                                         | 5.75<br>(3–25)                            | n/a                                                                                                       |
| Phase A<br>week 3 ( <i>n</i> = 16)           | n/a                                                                                         | 5.75<br>(3–25)                            | n/a                                                                                                       |
| Phase A<br>week 4 ( <i>n</i> = 16)           | n/a                                                                                         | 5.75<br>(3–25)                            | n/a                                                                                                       |
| Phase B<br>week 1 ( <i>n</i> = 16)           | 0                                                                                           | 6.75<br>(4–26)                            | Broccoli (37); Cauliflower (5); Mange tout (2);<br>Sugar snap peas (1); Beansprouts (1)                   |
| Phase B<br>week 2 ( <i>n</i> = 16)           | 0                                                                                           | 6.75<br>(4–26)                            | Broccoli (40); Cauliflower (4); Beansprouts (1); Figs (1)                                                 |
| Phase B<br>week 3 ( <i>n</i> = 16)           | 0                                                                                           | 6.75<br>(4–26)                            | Broccoli (37); Figs (2); Cauliflower (4); Sugar snap<br>peas (2); Beansprouts (1)                         |
| Phase B<br>week 4 ( <i>n</i> = 16)           | 0                                                                                           | 6.75<br>(4–26)                            | Broccoli (38); Figs (1); Sugar snap peas (3);<br>Cauliflower (3); Beansprouts (1)                         |
| Phase C<br>week 1 ( <i>n</i> = 16)           | 0                                                                                           | 7.75<br>(5–27)                            | Broccoli (40); Cauliflower (3); Figs (4); Sugar snap<br>peas (3); Beansprouts (1)                         |
| Phase C<br>week 2 ( <i>n</i> = 16)           | 2                                                                                           | 7.75<br>(5–27)                            | Broccoli (37); Cauliflower (6); Figs (3); Sugar snap<br>peas (3); Bamboo shoots (1)                       |
| Phase C<br>week 3 ( <i>n</i> = 14)           | 0                                                                                           | 7.75<br>(5–27)                            | Broccoli (31); Cauliflower (4); Figs (4); Sugar snap<br>peas (2); Green beans (1);<br>Brussel sprouts (2) |
| Phase C<br>week 4 ( <i>n</i> = 14)           | 1                                                                                           | 7.75<br>(5–27)                            | Broccoli (29); Cauliflower (6); Figs (4); Sugar snap<br>peas (3)                                          |
| Phase D<br>week 1 ( <i>n</i> = 16)           | 0                                                                                           | 6.75<br>(4–26)                            | Ice cream (30); Milk (10); Yoghurt (7)                                                                    |
| Phase D<br>week 2 ( <i>n</i> = 16)           | 3                                                                                           | 6.75<br>(4–26)                            | Ice cream (31); Milk (8); Yoghurt (7)                                                                     |
| Phase D<br>week 3 ( <i>n</i> = 12)           | 1                                                                                           | 6.75<br>(4–26)                            | Ice cream (28); Milk (3); Yoghurt (4)                                                                     |
| Phase D<br>week 4 ( <i>n</i> = 11)           | 4                                                                                           | 6.75<br>(4–26)                            | Ice cream (32)                                                                                            |
| Phase E<br>week 1 ( <i>n</i> = 8)            | 0                                                                                           | 7.75<br>(5–27)                            | Ice cream (17); Yoghurt (5)                                                                               |
| Phase E<br>week 2 ( <i>n</i> = 8)            | 0                                                                                           | 7.75<br>(5–27)                            | Ice cream (17); Yoghurt (5)                                                                               |
| Phase E<br>week 3 ( <i>n</i> = 7)            | 2                                                                                           | 7.75<br>(5–27)                            | Ice cream (17); Yoghurt (5)                                                                               |
| Phase E<br>week 4 ( <i>n</i> = 7)            | 1                                                                                           | 7.75<br>(5–27)                            | Ice cream (10); Yoghurt (4)                                                                               |

|                       |        |
|-----------------------|--------|
| <b>week 4 (n = 6)</b> | (5–27) |
|-----------------------|--------|

N/A: not applicable.

**Supplementary Table S2.** Mean change between milk protein intervention compared with fruit and vegetables protein.

| <b>Mean Change in Macronutrients Intake between Interventions</b>      |                          |                                                  |                                                        |                                               |                                                   |
|------------------------------------------------------------------------|--------------------------|--------------------------------------------------|--------------------------------------------------------|-----------------------------------------------|---------------------------------------------------|
|                                                                        | <b>Energy<br/>(kcal)</b> | <b>Energy<br/>(% of Energy<br/>Requirements)</b> | <b>Carbohydrate<br/>(% of Total<br/>Energy Intake)</b> | <b>Fat<br/>(% of Total<br/>Energy Intake)</b> | <b>Protein<br/>(% of Total<br/>Energy Intake)</b> |
| <b>Mean change of milk protein vs<br/>fruit and vegetables protein</b> | 68                       | 3.3                                              | −0.03                                                  | 0.3                                           | −0.3                                              |
| <b><i>p</i>-value</b>                                                  | 0.188                    | 0.102                                            | 0.961                                                  | 0.64                                          | 0.329                                             |
